# Supplementary material for: Molecular characterization of Golgi apparatus-related genes indicates prognosis and immune infiltration in osteosarcoma
Source: Aging (Albany NY). 2024 Mar 7;16(6):5249–63. doi: 10.18632/aging.205645 (PMC11006476; doi:10.18632/aging.205645)
Supplement: Supplementary Table 2 [file aging-16-205645-s002.xlsx]

## Sheet: Sheet1
Supplementary Table 2. The 186 prognostic GARGs.
id	HR	HR.95L	HR.95H	p-value
ABCB6	2.92723	1.32553	6.46431	0.00788033
ACER3	0.235287	0.0662984	0.835013	0.025158
ADRB2	0.580912	0.369752	0.912662	0.0184503
AGPAT3	0.264565	0.125559	0.557465	0.000471136
AKR7A3	2.14082	1.07663	4.25693	0.0299698
ALX1	0.847231	0.721897	0.994326	0.042395
AOC3	2.58445	1.10744	6.03138	0.0280939
AP1B1	0.170543	0.0424962	0.684411	0.0126023
AP1M1	0.282568	0.0920072	0.867812	0.0272707
AP1M2	0.720736	0.522528	0.994128	0.0459493
AP2A1	0.206385	0.046356	0.918864	0.0383571
APBB2	0.405728	0.173214	0.95036	0.0377826
APOE	0.409868	0.171918	0.97716	0.0442108
ARFGAP2	0.246472	0.0657552	0.923859	0.037761
ARHGAP32	0.725506	0.550183	0.956699	0.0229894
ATG9B	1.79723	1.21466	2.6592	0.00335892
B3GALT4	0.483814	0.278627	0.840106	0.00991501
B4GALNT1	2.1067	1.18799	3.73589	0.0107931
BET1	0.366113	0.139756	0.959096	0.0408587
C6orf89	0.274192	0.0857065	0.877192	0.0291981
CABP1	1.34119	1.01641	1.76975	0.0379831
CAMK1G	0.60623	0.401827	0.914611	0.0170623
CAT	0.256526	0.100347	0.655775	0.00449647
CAV1	0.472012	0.226372	0.984201	0.0452373
CCDC186	2.43909	1.01881	5.83932	0.0453062
CCDC91	0.555424	0.315177	0.978802	0.0419436
CD1E	1.43441	1.01178	2.03356	0.0427913
CD59	0.25516	0.0736271	0.884274	0.0312471
CHIC2	0.28885	0.0921905	0.905019	0.0330695
CHST14	0.16191	0.0399198	0.65669	0.0108143
CHST4	1.57489	1.0082	2.46011	0.0459493
CLEC16A	0.118289	0.0264175	0.529662	0.00525697
CLTC	0.187797	0.0481844	0.731935	0.0159707
CLTCL1	0.353892	0.206851	0.605457	0.000149813
COG1	0.202612	0.0568669	0.72189	0.013791
COLEC10	1.5339	1.16746	2.01534	0.00212879
COMMD9	0.312652	0.124943	0.782367	0.0129767
CPE	4.34421	1.13503	16.627	0.0319589
CPTP	0.30124	0.0928961	0.976849	0.0456096
DCN	0.347638	0.18393	0.657053	0.00114185
DEFA5	1.44544	1.04143	2.00617	0.0276161
DSE	0.506271	0.296326	0.864962	0.0127449
DSEL	0.65669	0.498308	0.865413	0.00282221
DYNC2H1	2.33125	1.16586	4.66156	0.0166654
EGFR	0.69971	0.52814	0.927017	0.0128472
EMP2	0.310934	0.101942	0.948377	0.0400611
EPHB2	0.497191	0.299466	0.825465	0.0069028
EXT2	0.263607	0.0746297	0.931116	0.0383761
F8	0.61524	0.38469	0.983963	0.0426173
FGFRL1	0.440514	0.209769	0.925077	0.0303344
FIG4	0.344072	0.129571	0.913667	0.0322609
GAL	1.481	1.09942	1.99503	0.00978176
GAL3ST4	0.428146	0.231082	0.793266	0.00701735
GALNT10	0.386218	0.179065	0.833016	0.0152733
GALNT14	1.56481	1.02231	2.39517	0.039249
GALNT7	0.561479	0.326988	0.964128	0.036403
GAS6	0.50155	0.282241	0.89127	0.0186547
GBP1	0.345041	0.224774	0.529658	1.13654e-06
GBP2	0.521696	0.336778	0.808151	0.00356992
GBP3	0.487486	0.318333	0.746521	0.000951711
GBP4	0.680793	0.474826	0.976101	0.0364792
GBP5	0.721378	0.553105	0.940844	0.0159562
GCNT7	1.58052	1.02438	2.43859	0.0385639
GGA1	0.274478	0.0779007	0.967109	0.0442188
GLB1	0.260366	0.0932424	0.727035	0.0102168
GLCE	0.130807	0.0485891	0.352144	5.68291e-05
GLIPR2	0.358653	0.176853	0.727338	0.00447619
GOLGA1	0.156958	0.0366083	0.672956	0.0126583
GPER1	1.60294	1.01203	2.53889	0.0443343
GRN	0.228021	0.0703607	0.738957	0.0137307
HAS2	0.757598	0.600693	0.955487	0.0190513
HERC1	0.184339	0.0606514	0.560267	0.00286913
HHAT	0.605341	0.420119	0.872224	0.00706966
HIP1	0.297541	0.0892458	0.991985	0.0484885
HS2ST1	0.213982	0.0591822	0.773683	0.0187102
HS3ST2	0.711498	0.532549	0.950576	0.0212851
HS3ST3B1	0.717279	0.534112	0.963261	0.0271906
HS3ST4	0.598718	0.410449	0.873345	0.00774444
HTT	0.305282	0.0982325	0.94874	0.0402748
HYAL2	0.318982	0.107109	0.949956	0.0401531
IFT27	0.387726	0.160878	0.934446	0.0347695
IHH	1.27914	1.04112	1.57158	0.0191004
ITGA5	0.327214	0.12054	0.888244	0.0283394
KBTBD8	0.596835	0.389286	0.915041	0.0179238
KERA	0.823773	0.695441	0.975786	0.0248549
KRAS	0.327964	0.111932	0.960942	0.0420927
LEPROT	0.253626	0.0712313	0.903057	0.034231
LFNG	0.465615	0.246984	0.877779	0.0181306
LGR6	1.29417	1.00222	1.67116	0.0480478
LLGL1	0.338991	0.127405	0.901968	0.0302648
LRP2	1.36608	1.00815	1.85109	0.044186
LYPLA2	0.147596	0.0237808	0.916061	0.0399671
M6PR	0.295984	0.0909879	0.962837	0.0430845
MAMLD1	0.497083	0.287269	0.860138	0.0124724
MAN1C1	0.569171	0.370468	0.874449	0.0101021
MAP6	0.697035	0.504029	0.963949	0.0291144
MAPK1	0.225823	0.0640932	0.795655	0.0205743
MAPKAP1	0.122952	0.0292039	0.517639	0.00426624
MDGA1	0.723916	0.554496	0.945101	0.0175469
MMD	0.165705	0.0719202	0.381785	2.43129e-05
MS4A4A	0.646592	0.423878	0.986324	0.0429828
MUC1	1.9981	1.23829	3.22413	0.00457561
MUC15	0.78578	0.661946	0.932781	0.00586491
MYO6	2.87299	1.17225	7.04123	0.0210306
NAA60	0.220337	0.0773866	0.627348	0.0046066
NAGPA	0.404456	0.189696	0.862353	0.0191126
NCALD	1.67955	1.04035	2.71147	0.0338517
NDFIP2	2.59918	1.09434	6.17338	0.0304476
NEO1	0.265887	0.0803037	0.880355	0.0301152
NMNAT2	0.532362	0.342637	0.827142	0.00504607
NSF	0.174043	0.0434958	0.696408	0.0134592
NSFL1C	0.24494	0.060209	0.996453	0.0494226
OLFM3	0.75484	0.587237	0.970279	0.0281287
OSBPL9	5.33985	1.06485	26.7775	0.0417157
P3H2	0.581954	0.375432	0.90208	0.0154876
PI4K2A	0.292357	0.0883407	0.967534	0.0440079
PIKFYVE	3.62376	1.36532	9.61797	0.00973216
PLD1	0.427914	0.19003	0.96359	0.0404116
PLD3	0.191743	0.0520244	0.706698	0.0130805
PLEKHA8	0.30979	0.1324	0.724853	0.00689465
PLIN3	0.340681	0.116712	0.994446	0.0488207
PMEPA1	0.258656	0.107189	0.624158	0.00262373
POSTN	0.45841	0.234915	0.894533	0.0222126
PPIL2	0.120747	0.0307516	0.474118	0.00245046
PRAME	0.858415	0.738049	0.99841	0.0476358
PRKD1	0.703131	0.496901	0.994951	0.0467517
PRKD2	0.188787	0.0431436	0.826095	0.0268538
PRNP	0.272106	0.0873752	0.847402	0.0247266
PSEN1	0.228925	0.0575061	0.91132	0.0364647
PSKH1	0.251965	0.0689814	0.920341	0.0370189
PTCH1	1.73745	1.02486	2.94551	0.0402526
RAB11A	0.219902	0.0488036	0.990846	0.0486167
RAB27B	0.619306	0.435707	0.880271	0.00756742
RAB3IP	0.568207	0.370287	0.871916	0.00967267
RAB40C	0.103642	0.0247752	0.433564	0.00190589
RAB6B	1.78456	1.02158	3.11737	0.0418523
RAB7B	0.602333	0.366152	0.990861	0.0459213
RASGRP1	0.519413	0.29892	0.902549	0.020143
RHBDD2	0.127992	0.0254535	0.643602	0.0126053
RP2	0.207745	0.0606654	0.711409	0.0123445
RRAS2	2.47451	1.0075	6.07765	0.0481263
S100A3	0.560974	0.380005	0.828125	0.00362614
SCAP	0.212189	0.0504683	0.892128	0.0343666
SCOC	0.264031	0.0757142	0.920733	0.0366584
SDC3	0.212105	0.0895976	0.502119	0.00042056
SGMS2	2.31609	1.01499	5.28505	0.0460084
SLC2A4	1.30231	1.01895	1.66446	0.0348666
SLC35A4	0.139499	0.0298818	0.651228	0.0122266
SLC35B4	0.190435	0.0439214	0.825688	0.0266996
SLC35C1	0.33501	0.134818	0.832468	0.0185334
SLC35E4	0.452501	0.235173	0.870668	0.0175623
SLC35G2	1.93683	1.06722	3.51503	0.0297114
SNAP25	0.770149	0.620252	0.956273	0.0180392
SNAP29	0.155557	0.0299716	0.807361	0.0267843
SNX1	0.143378	0.0412886	0.497892	0.00222891
SNX9	0.357703	0.129743	0.986197	0.0469417
SOST	1.22291	1.00073	1.49443	0.0491748
ST3GAL2	0.178877	0.0557918	0.573507	0.0037882
ST3GAL4	5.83319	1.14589	29.6942	0.0336724
ST6GAL2	0.814966	0.669626	0.991851	0.0411902
ST6GALNAC5	0.769709	0.606215	0.977295	0.0316757
ST8SIA6	0.720133	0.54965	0.943494	0.0172211
STC2	2.9386	1.41057	6.12191	0.00399463
TENM2	0.80467	0.653251	0.991186	0.0410332
TLR6	0.594953	0.372935	0.949145	0.0293331
TM9SF4	0.214672	0.0508768	0.905795	0.0362011
TMEM251	0.165124	0.0446561	0.610577	0.00694673
TMEM43	0.18667	0.0579946	0.600842	0.00489176
TMEM50B	0.132029	0.0264081	0.660082	0.0136687
TMEM79	0.2154	0.0605093	0.766777	0.0177932
TNFRSF1A	0.226505	0.0785497	0.653147	0.0059909
TRAPPC1	0.296863	0.0913559	0.964665	0.043405
TRIM68	0.238876	0.108988	0.52356	0.000348573
UBAC1	0.124213	0.0194972	0.791343	0.0272675
UBIAD1	0.207555	0.0503057	0.856349	0.0296735
USP33	0.139648	0.021791	0.894932	0.0377935
VAC14	0.159642	0.0489002	0.521176	0.0023698
VAMP2	0.226588	0.0567934	0.904015	0.0354748
VCAM1	0.577504	0.405615	0.822234	0.00232087
VIPAS39	0.236485	0.0628894	0.889265	0.0328732
WDR44	3.04609	1.12579	8.24192	0.0282885
WNT5A	0.479835	0.290214	0.79335	0.00420584
YIPF1	0.175606	0.0365787	0.84304	0.0297592
ZDHHC11B	1.30545	1.01146	1.68487	0.0406077
ZDHHC23	1.6174	1.10629	2.36465	0.0130921
ZDHHC3	0.22725	0.0732998	0.704537	0.01027
